# Supplementary material for: Beyond the melting point annealing of poly(vinylidene fluoride) for enhanced piezoelectric performance
Source: Royal Society of Chemistry journal article supplement (doi:10.1039/d5mh01226k), 2025-11-24
Supplement: d5mh01226k1.pdf [file d5mh01226k1.pdf]

## Supporting Information

### **Beyond the Melting Point Annealing of Poly (vinylidene fluoride) for Enhanced Piezoelectric Performance**

Stephen T Hsieh<sup>a</sup>, Sheng Ye<sup>\*a</sup>, Rui Jian<sup>a</sup>, Jon R. Peterson<sup>a</sup>, Hao Mei<sup>a</sup> and Andrew J. Ouderkirk<sup>a</sup>

<sup>a</sup> Meta Reality Labs, 9845 Willows Road, Redmond, WA, 98052

Corresponding authors. Emails: [\\*sunnyye@meta.com](mailto:*sunnyye@meta.com);

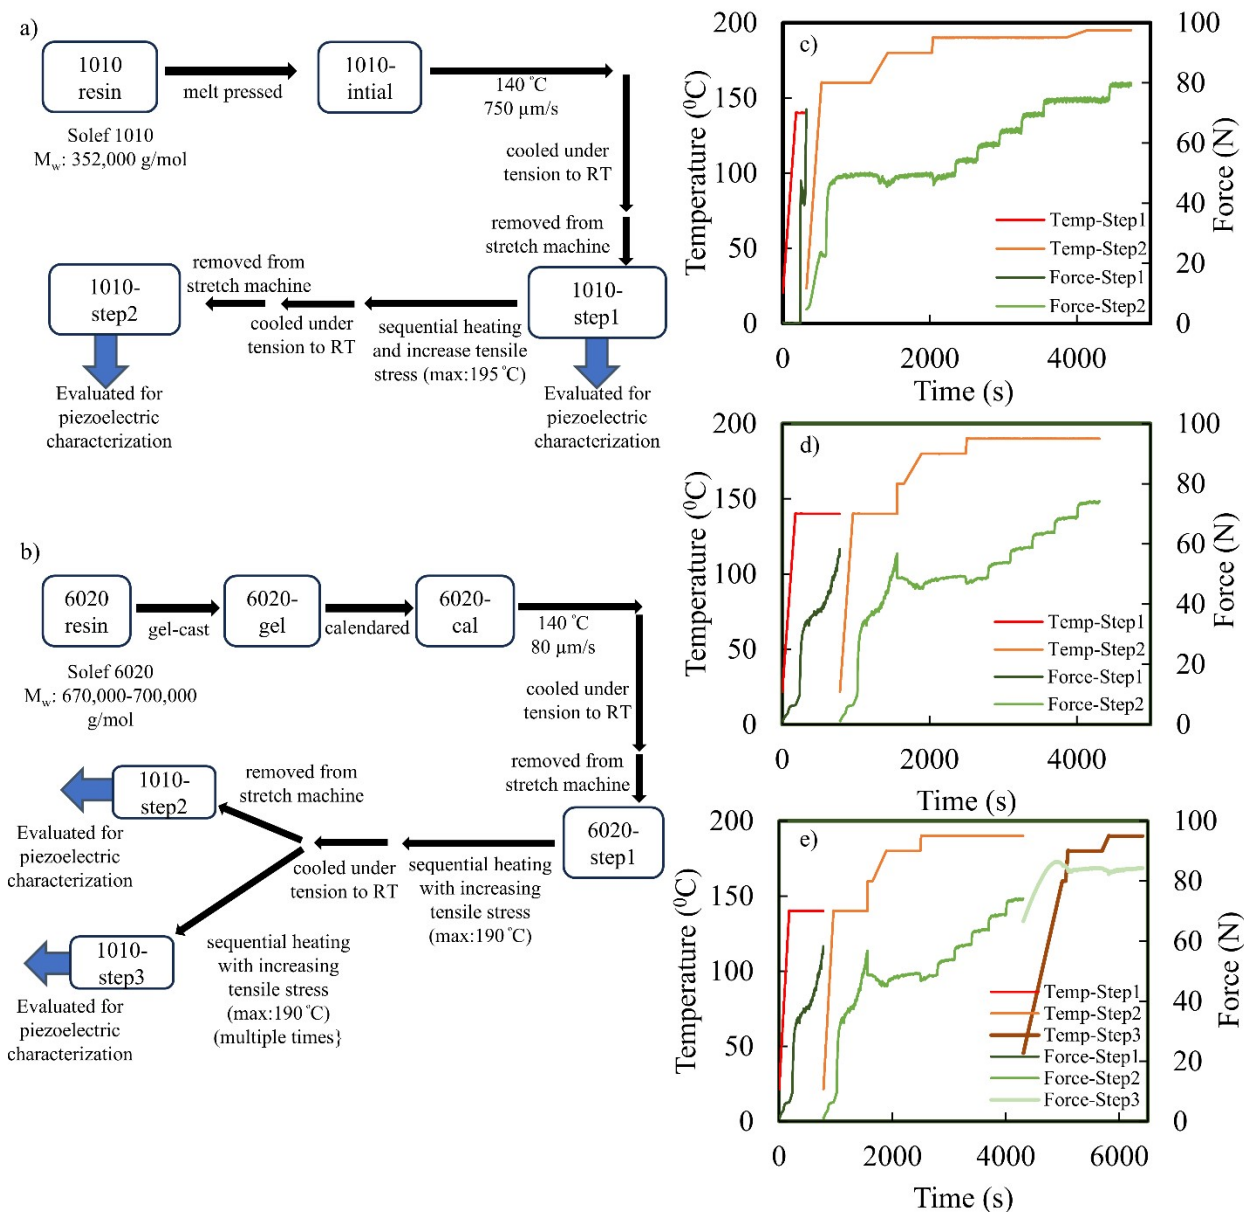

Fig S1. Schematic of the a) 1010 process and the b) 6020 process. Example Force/Temperature curve of the entire process for c) 1010-step1,2 films; d) 6020-step1,2 e) 6020-step1,2,3 films.

### S1.1 Polarized FTIR in the ATR or Transmission Mode

However, due to the anticipated chain alignment in our films, polarized measurements of the film would be more useful. Differences in polarized IR light interactions with directional molecular vibrations have been used to measure the crystal and amorphous chain alignment of PVDF films(1–4) and as well as characterize alignment in other polymers(5–7). Furthermore, even unpolarized light will split into a Transverse Electric (TE) and Transverse Magnetic (TM) upon total internal reflection. These TE and TM reflections will have different mode volume

interactions, leading to different signals depending on orientation for anisotropic films regardless if the IR light was polarized(8). While not a concern for isotropic films, in our anticipated highly stretched anisotropic films, the issue of MD orientation is more of a concern.

To control this effect, we polarize the incoming IR light, such that the only ATR-FTIR light interacting with the sample is the TE orientation, similar to previous reports(7,8). As shown in Figure S2, equivalent  $\perp$  and  $\parallel$  molecular-IR interactions to polarized transmission mode IR can be obtained by rotating the film with respect to the beam direction/electric field (TE).

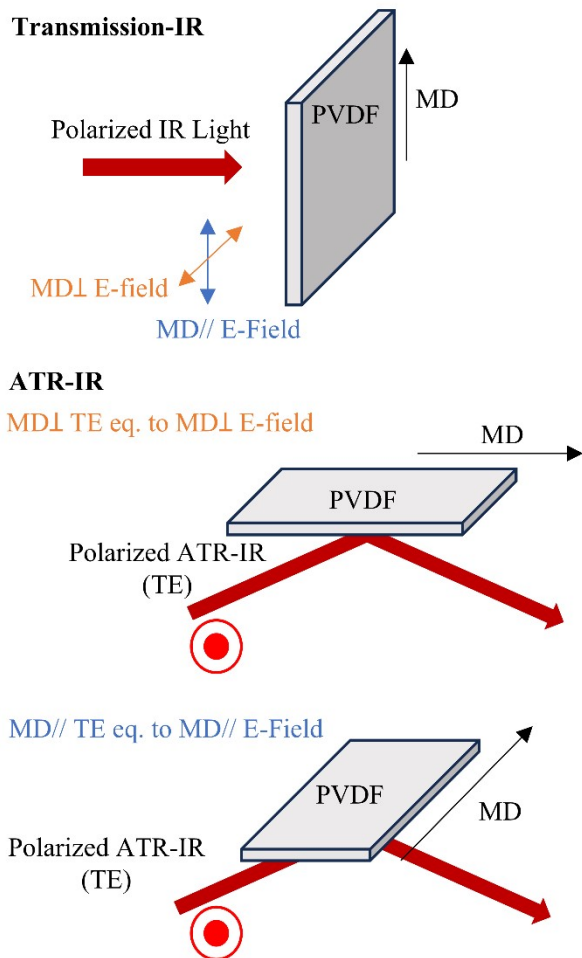

*Fig. S2: Schematical representation of Polarized Transmission IR and Polarized ATR-IR. Note similar MD-Light interactions between transmission and ATR can be achieved*

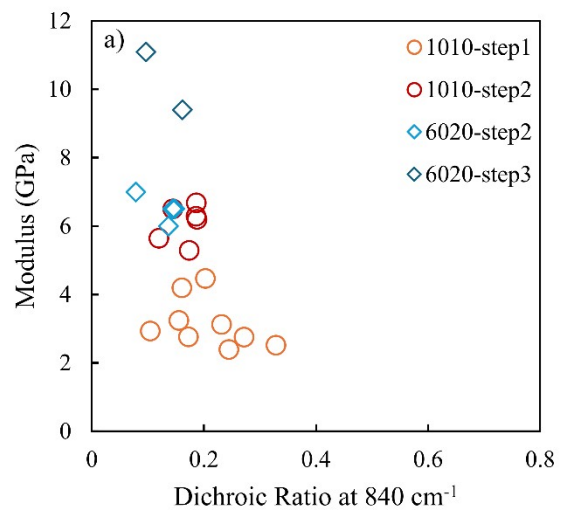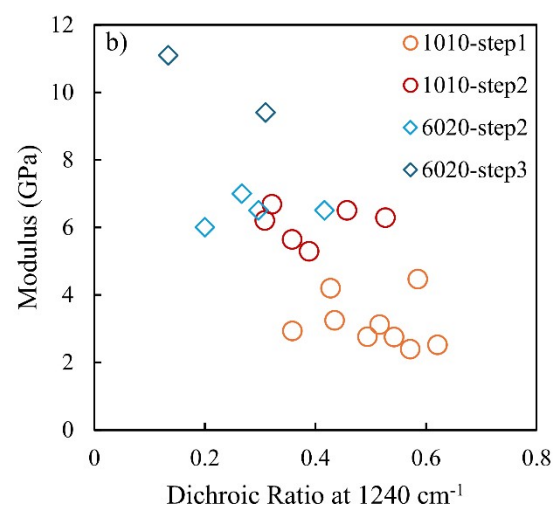

Figure S3: Comparison of Modulus with Dichroic Ratio at  $\beta$  peaks at a) 840 cm<sup>-1</sup> and b) 1240 cm<sup>-1</sup>

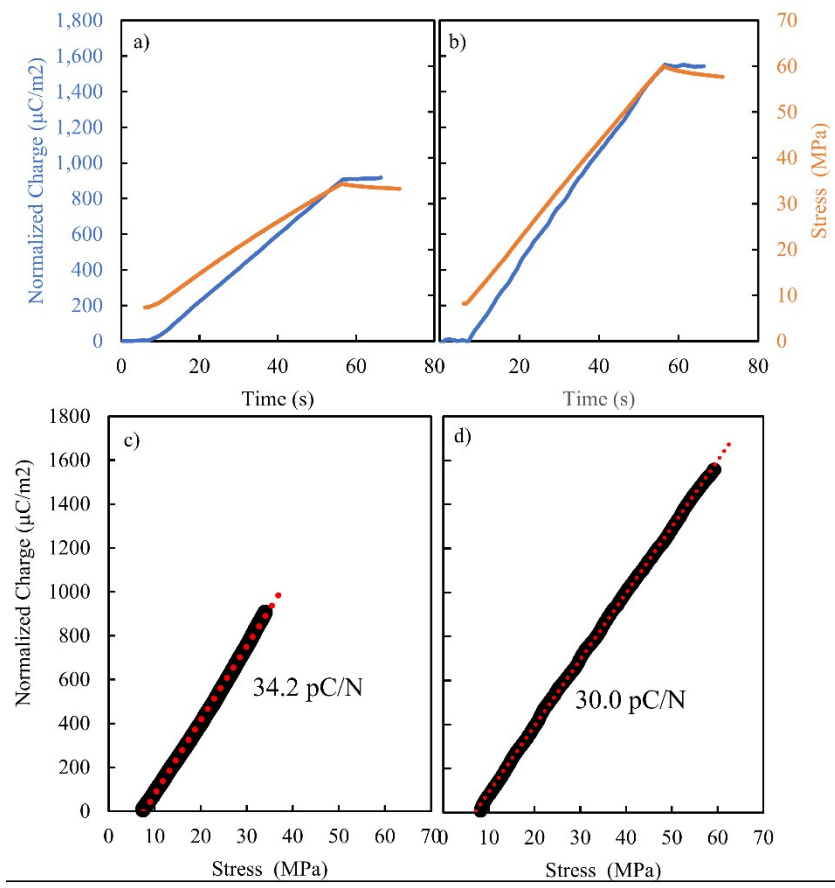

*Fig. S4: Example stress and normalized charge curve for a) 1010-step1 film b) 6020-step2 film. Example of how the slope of the normalized charge compared to stress is used to compute the  $d_{31}$  of the same of c) 1010-step1 and d) 6020-step2 film*

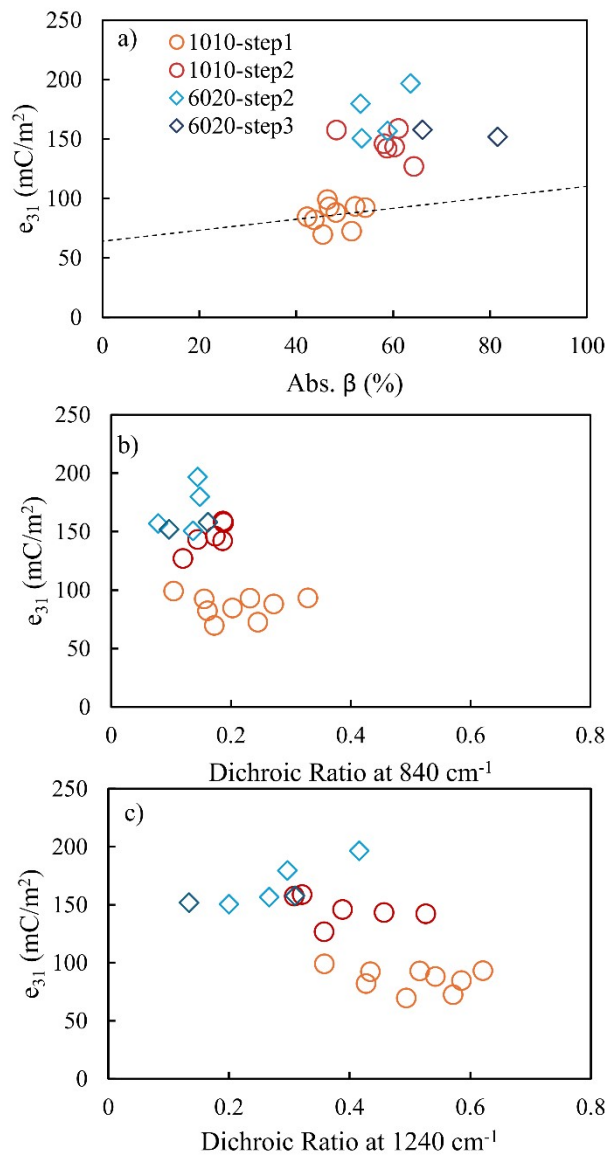

Fig. S5: Comparison of  $e_{31}$  with respect to a) abs.  $\beta$  content and Dichroic Ratios at b) 840 cm<sup>-1</sup> and c) 1240 cm<sup>-1</sup>.

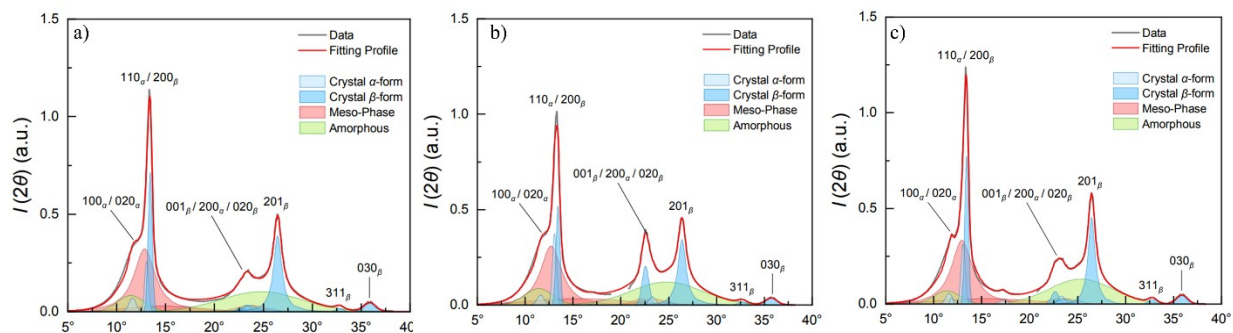

Fig. S6: WAXS analysis of a) 1010-step1, b) 1010-step2, c) 6020-step2 films.

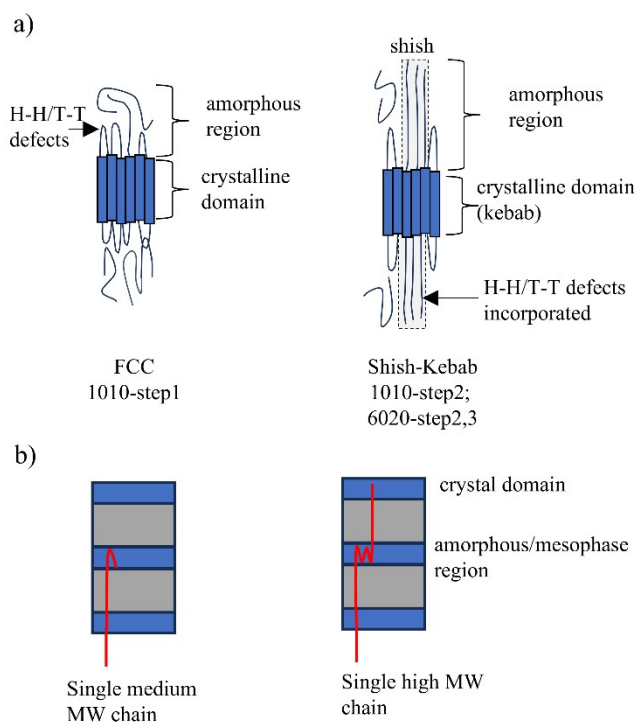

Fig. S7: a.) Schematical depiction of the difference between FCC crystal/amorphous (1010-step1) and Shish-Kebab crystals (1010-step2; 6020-step2,3). Note the changes at the crystal-amorphous interface are different between FCC & Shish-Kebab. b.) A potential difference between the shorter chain 1010-step2 films and longer chain 6020-step2,3 films. Due to the longer chain length for 6020, a single chain may extend into multiple different crystals and kebabs

## References:

1. Nakamura K, Nagai M, Kanamoto T, Takahashi Y, Furukawa T. Development of oriented structure and properties on drawing of poly(vinylidene fluoride) by solid-state coextrusion. *J Polym Sci Part B Polym Phys*. 2001 June 15;39(12):1371–80.
2. Nakamura K, Sawai D, Watanabe Y, Taguchi D, Takahashi Y, Furukawa T, et al. Effect of annealing on the structure and properties of poly(vinylidene fluoride)  $\beta$ -form films. *J Polym Sci Part B Polym Phys*. 2003 July 15;41(14):1701–12.
3. Kuo WK, Shieh MY, Yu HH. Three-dimensional infrared absorption of hot-drawn and poled electro-optic PVDF films. *Mater Chem Phys*. 2011 Sept;129(1–2):130–3.
4. Lanceros-Méndez S, Mano JF, Costa AM, Schmidt VH. FTIR AND DSC STUDIES OF MECHANICALLY DEFORMED  $\beta$ -PVDF FILMS. *J Macromol Sci Part B*. 2001 May 31;40(3–4):517–27.
5. Nitta K hei, Sawada T, Yoshida S, Kawamura T. Three dimensional molecular orientation of isotactic polypropylene films under biaxial deformation at higher temperatures. *Polymer*. 2015 Sept;74:30–7.
6. Bokobza L. Infrared Linear Dichroism for the Analysis of Molecular Orientation in Polymers and in Polymer Composites. *Polymers*. 2022 Mar 21;14(6):1257.
7. Ishige R, Song CL, Hara S, Ando S, Kazarian SG. Analysis of spatial orientation distribution of highly oriented polyimide film using micro ATR-FTIR spectroscopic imaging method. *Polymer*. 2021 Apr;221:123616.
8. Kirov KR, Assender HE. Quantitative ATR-IR Analysis of Anisotropic Polymer Films: Extraction of Optical Constants. *Macromolecules*. 2004 Feb 1;37(3):894–904.
